# Supplementary material
Source: PubMed Central journal article supplement (PMC8837715)

**Bar Chart**

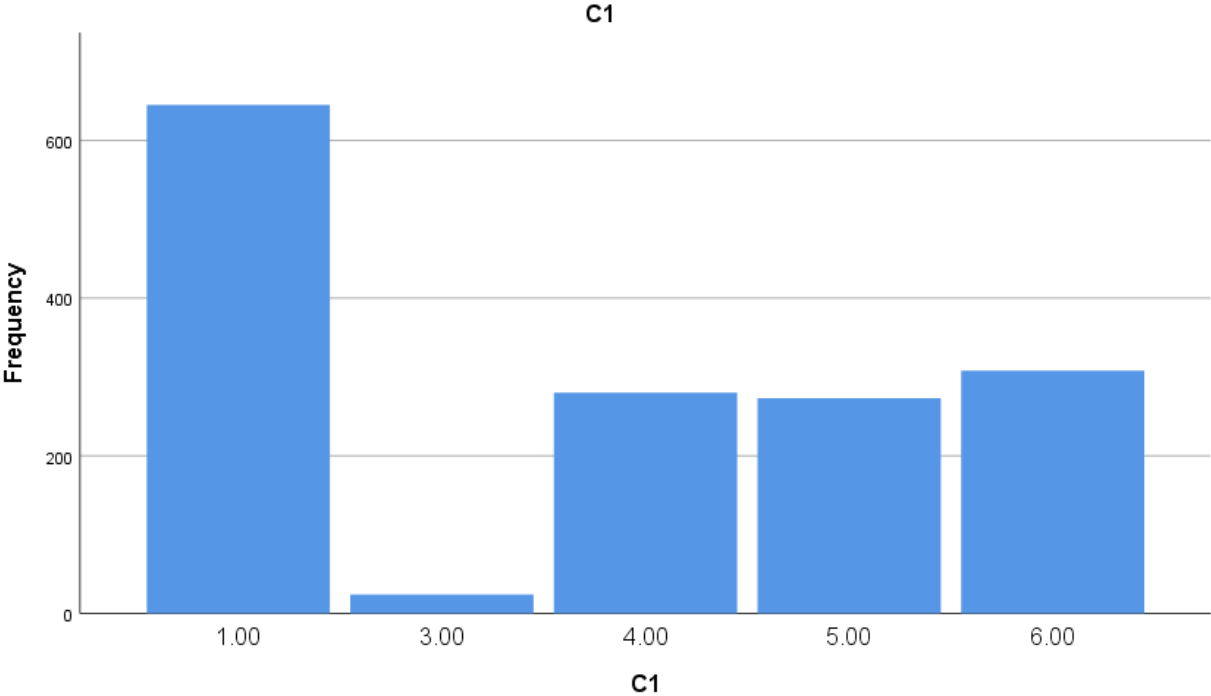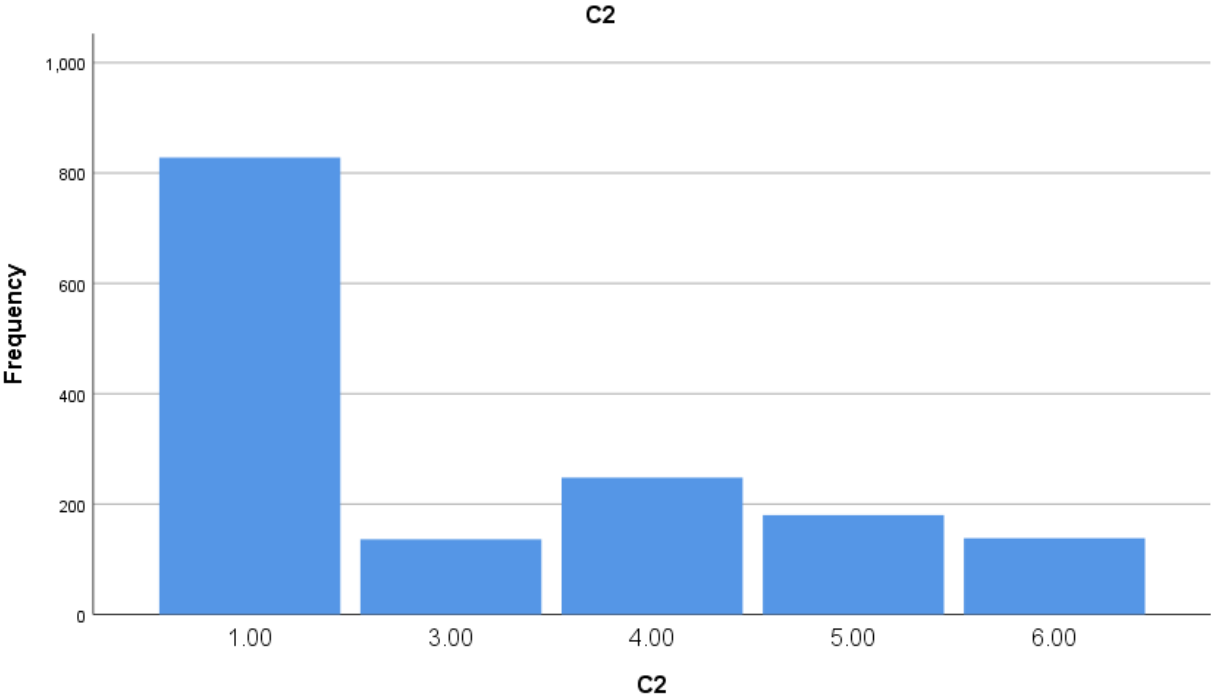

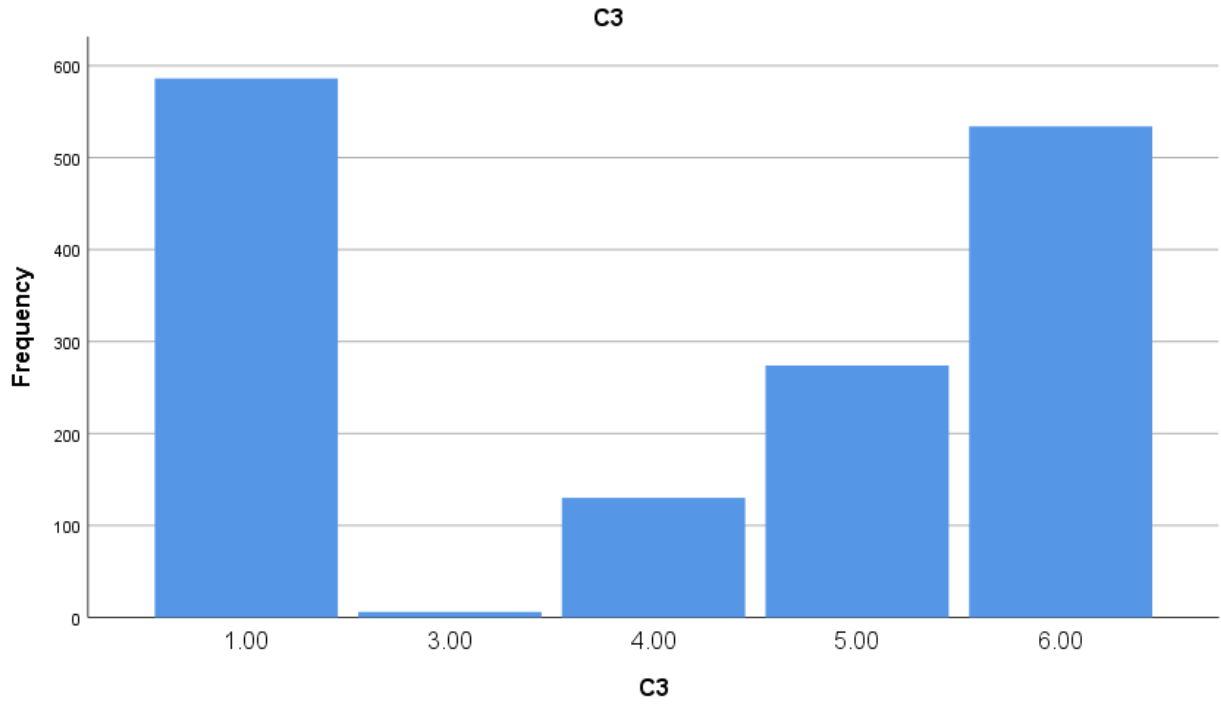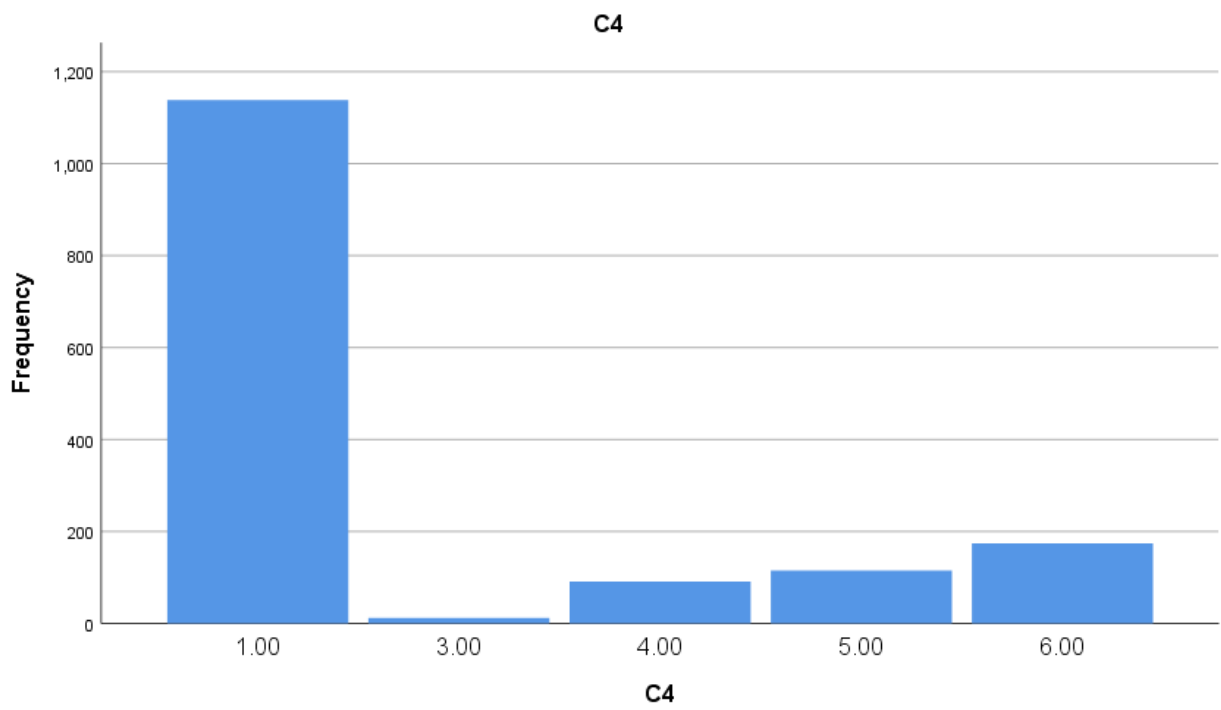

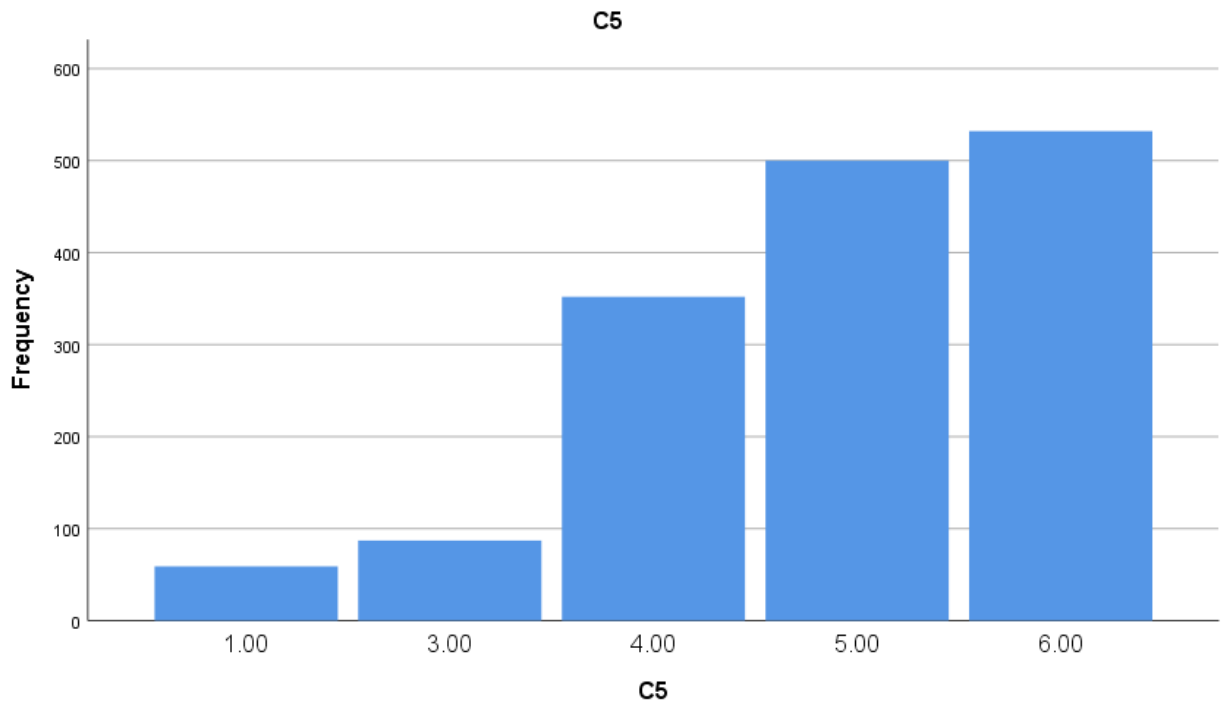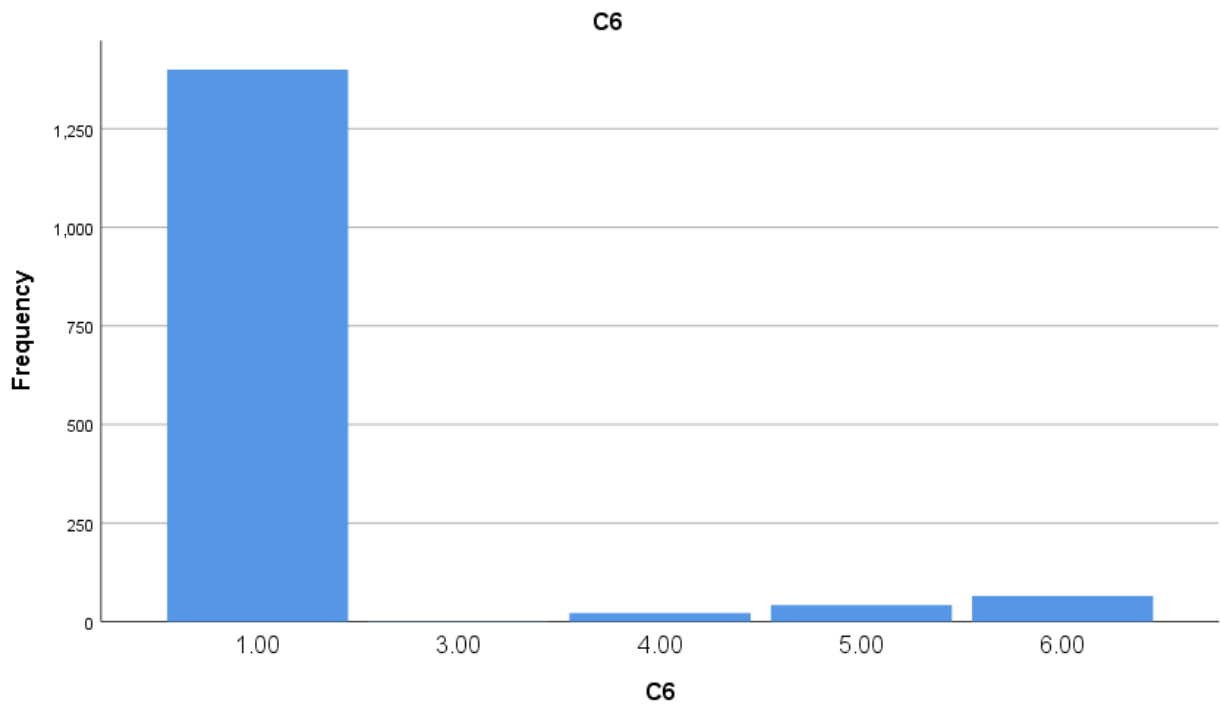

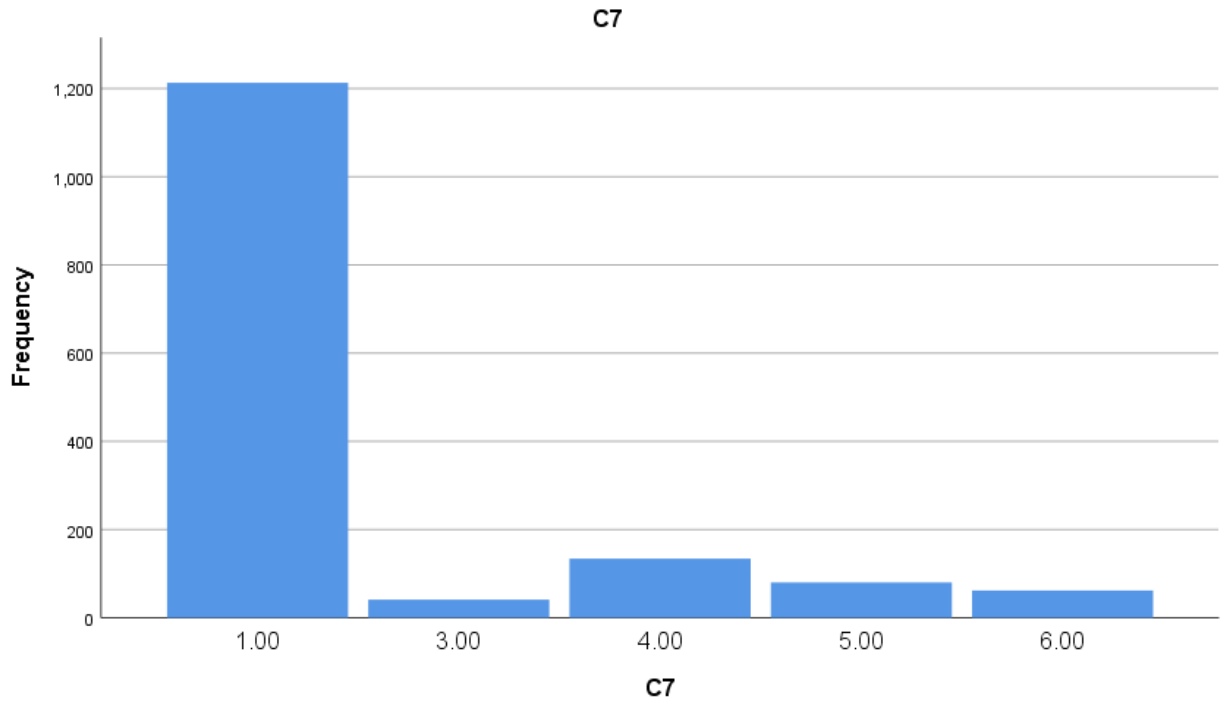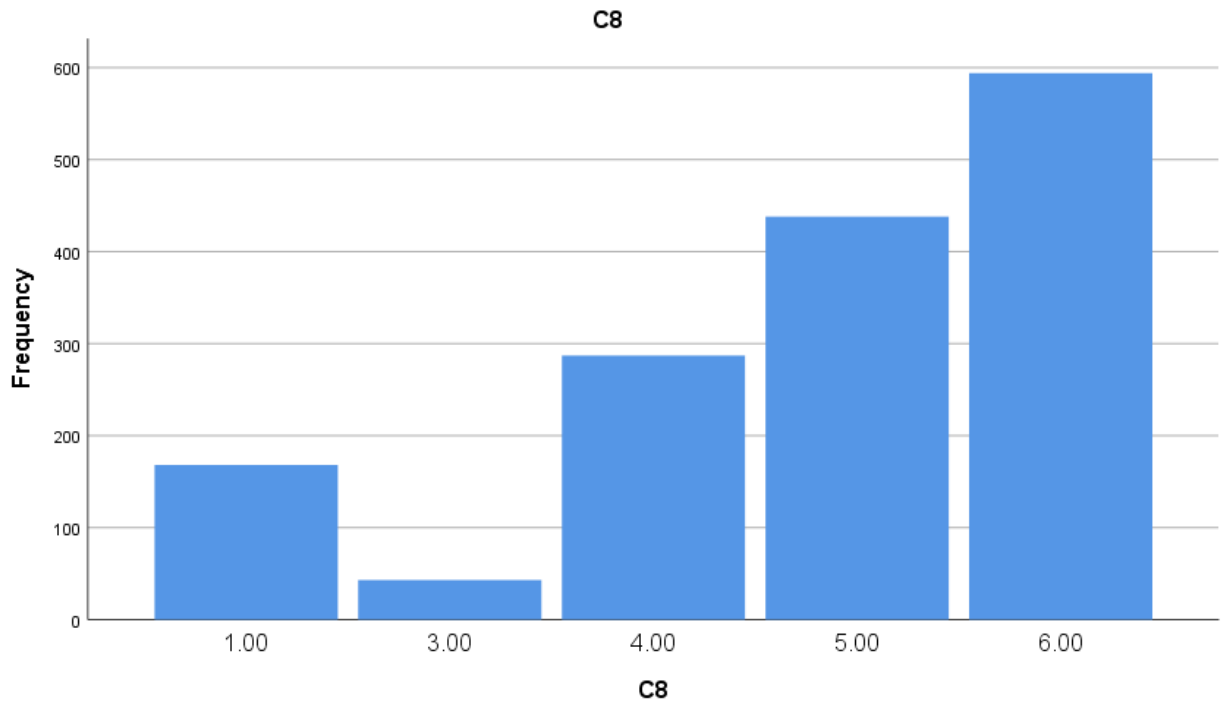

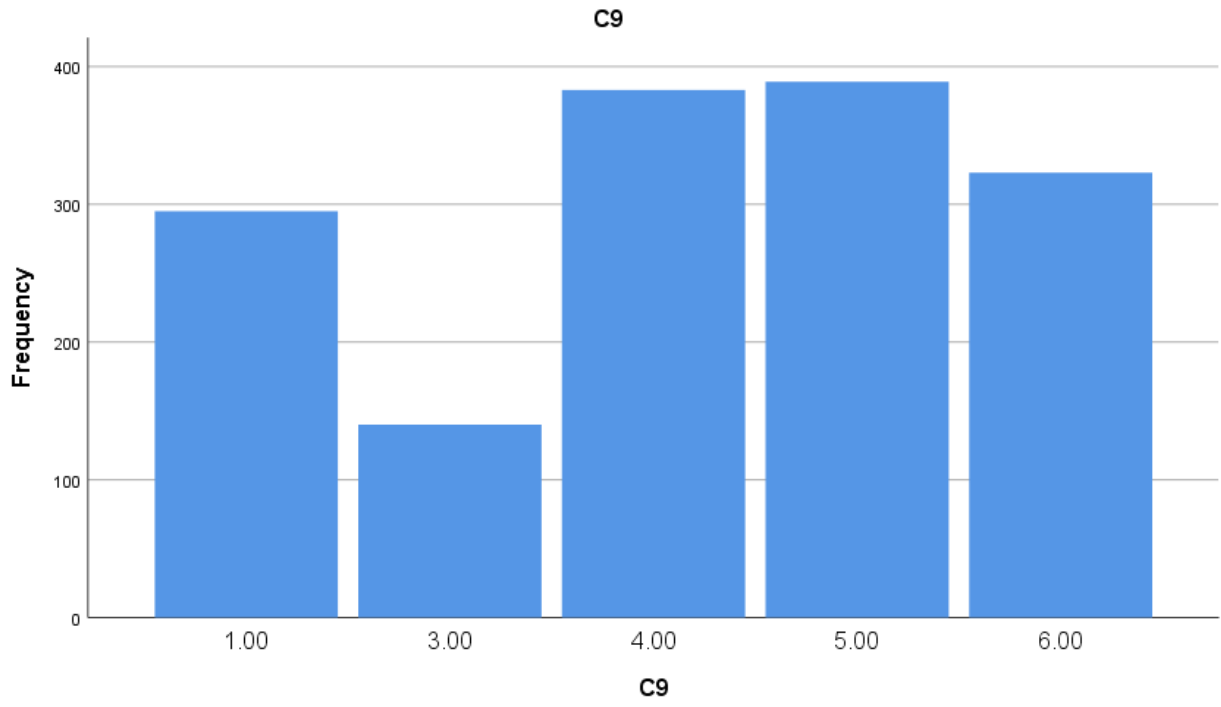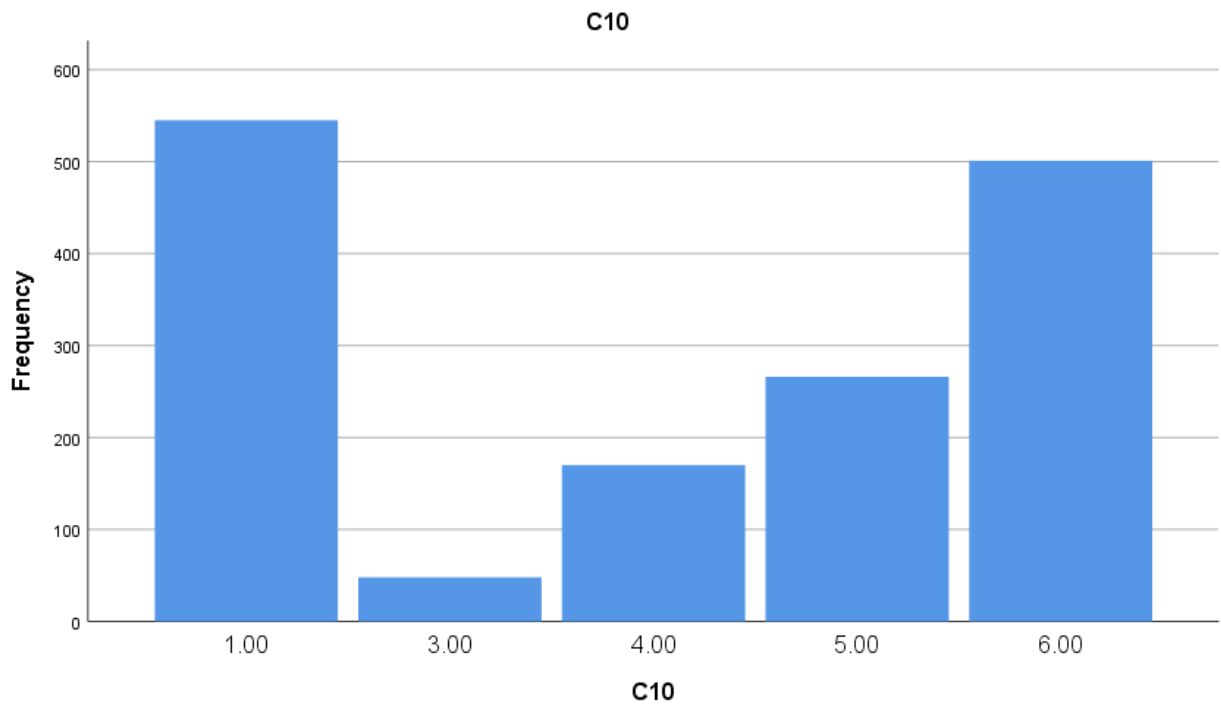

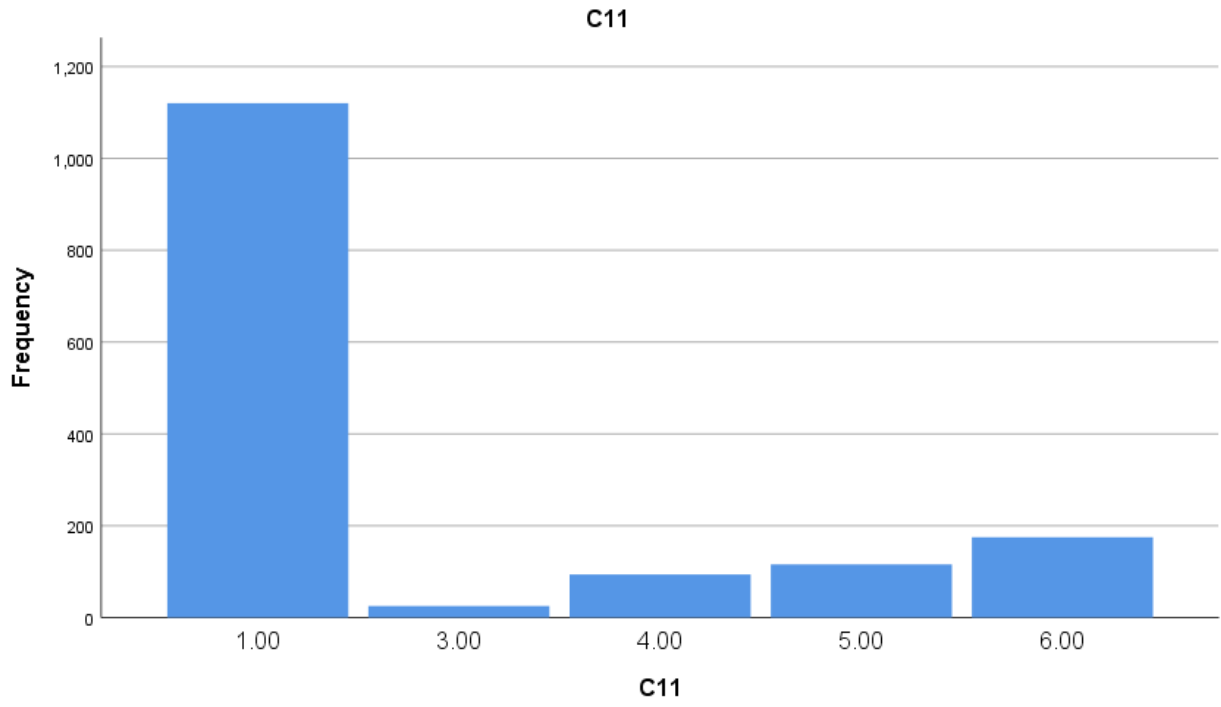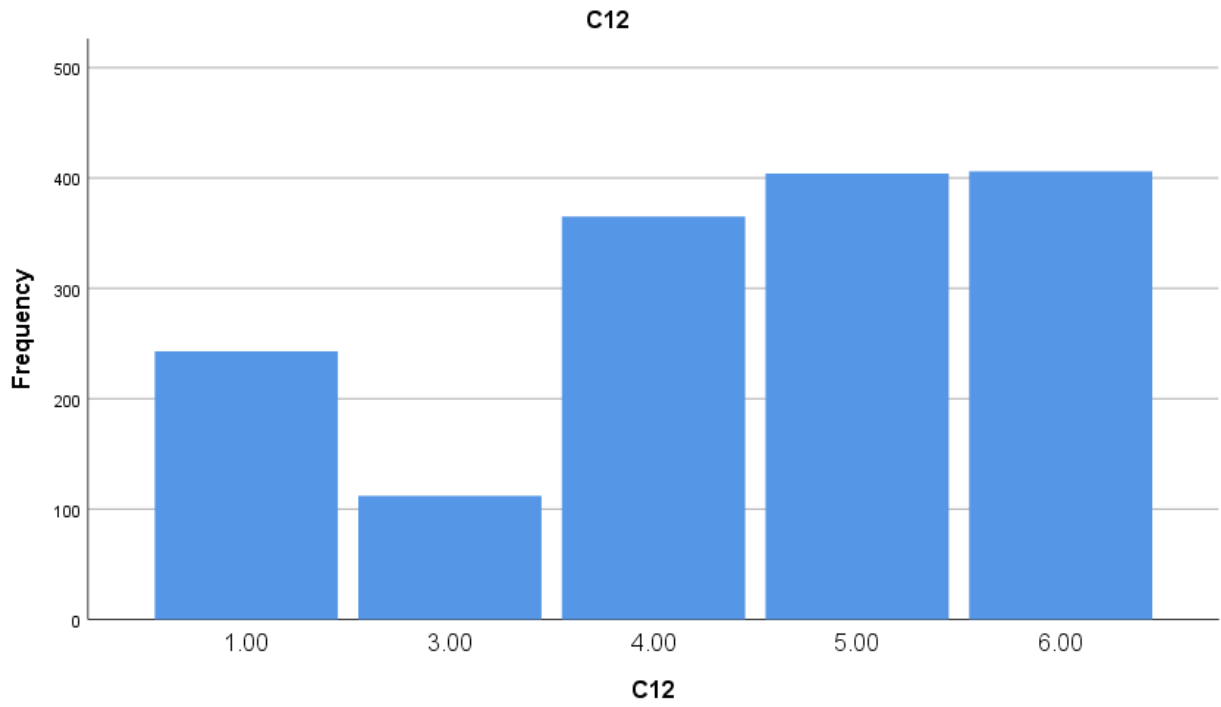

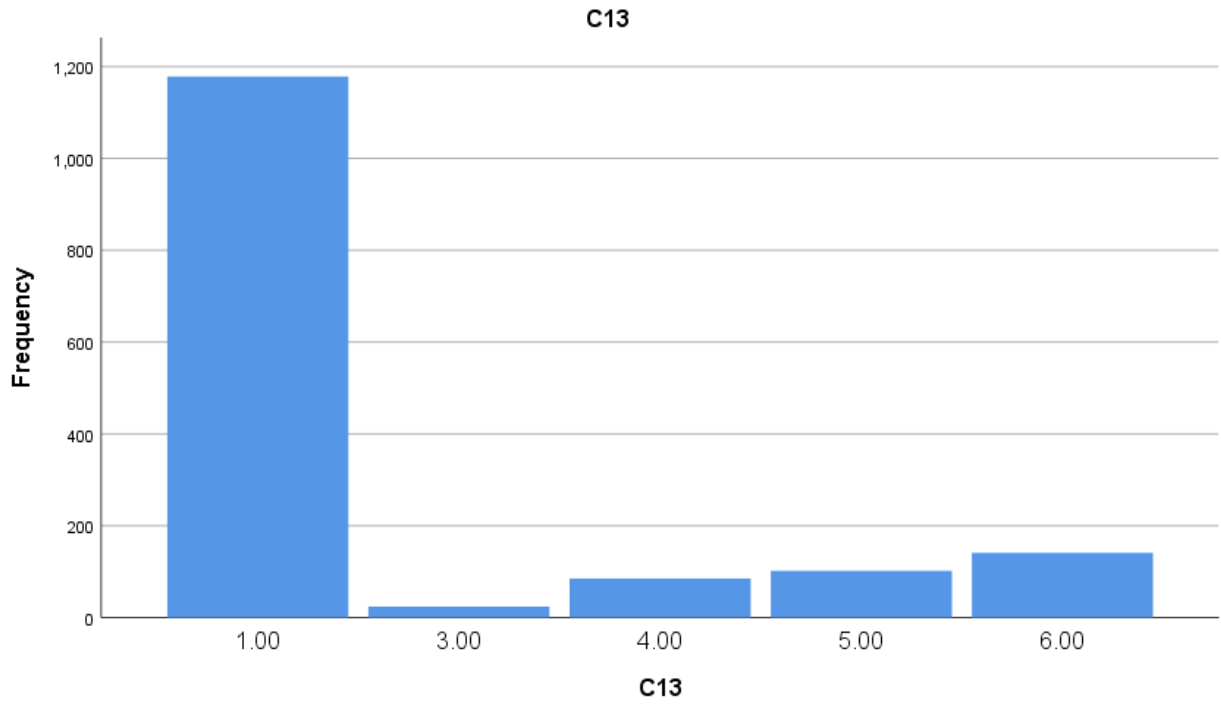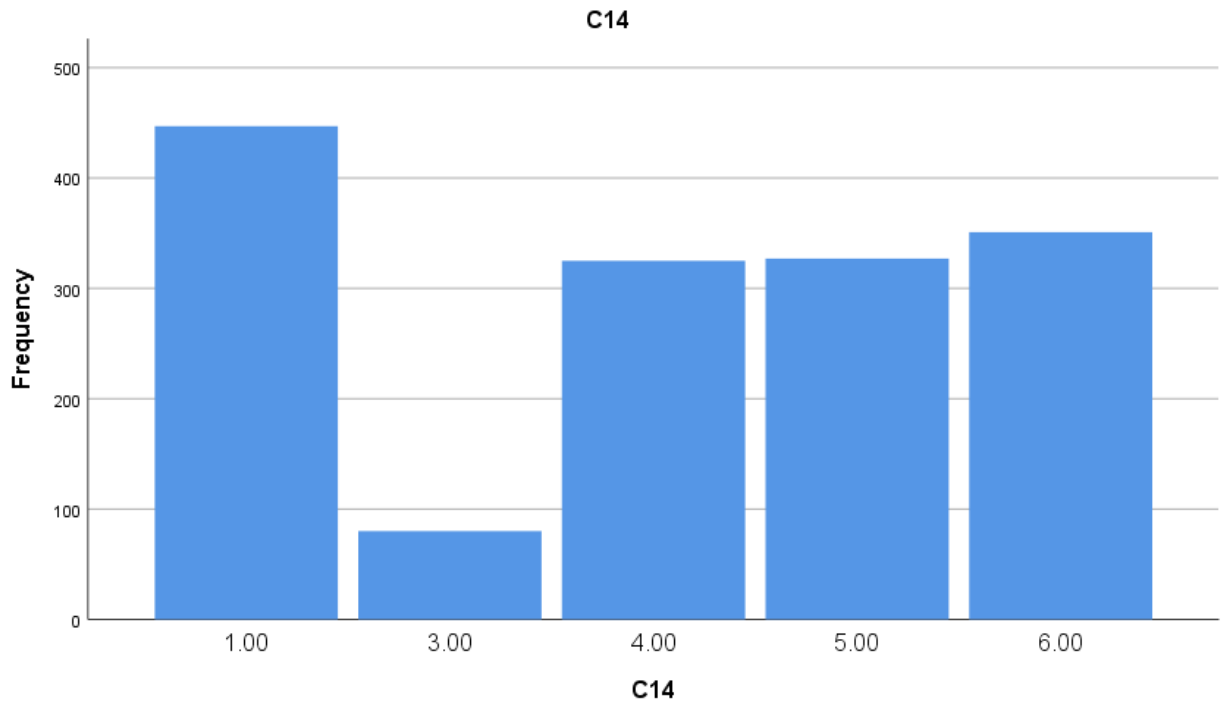

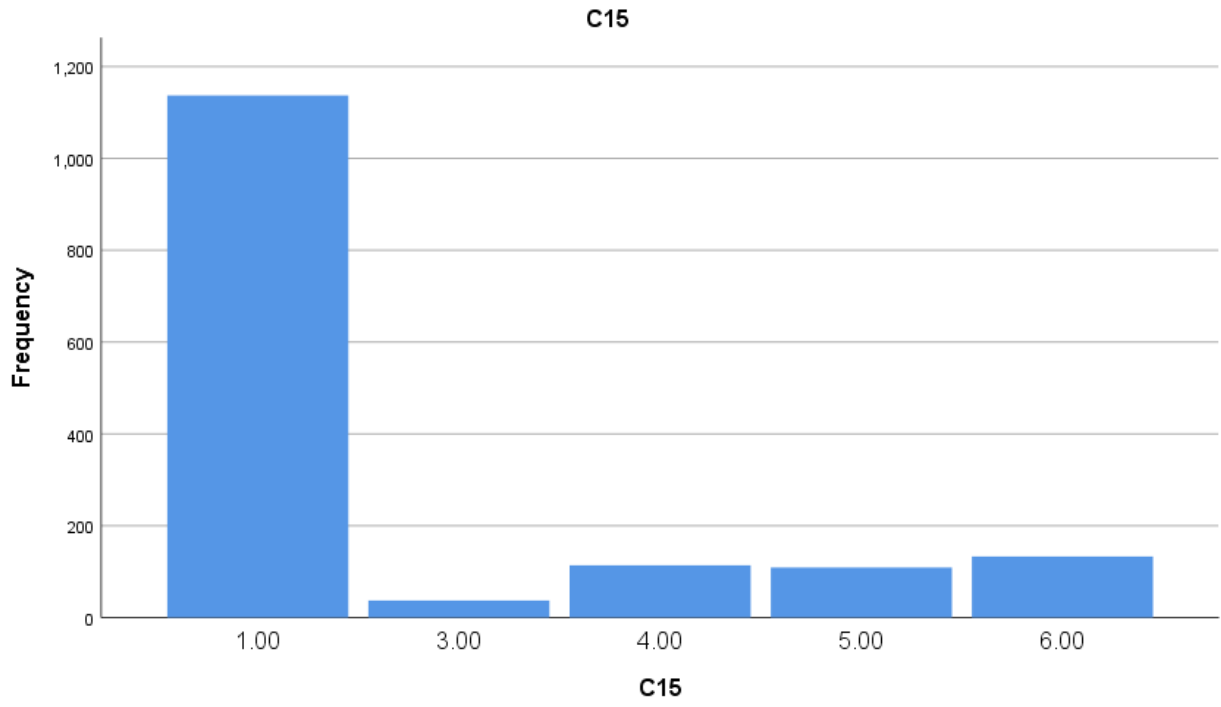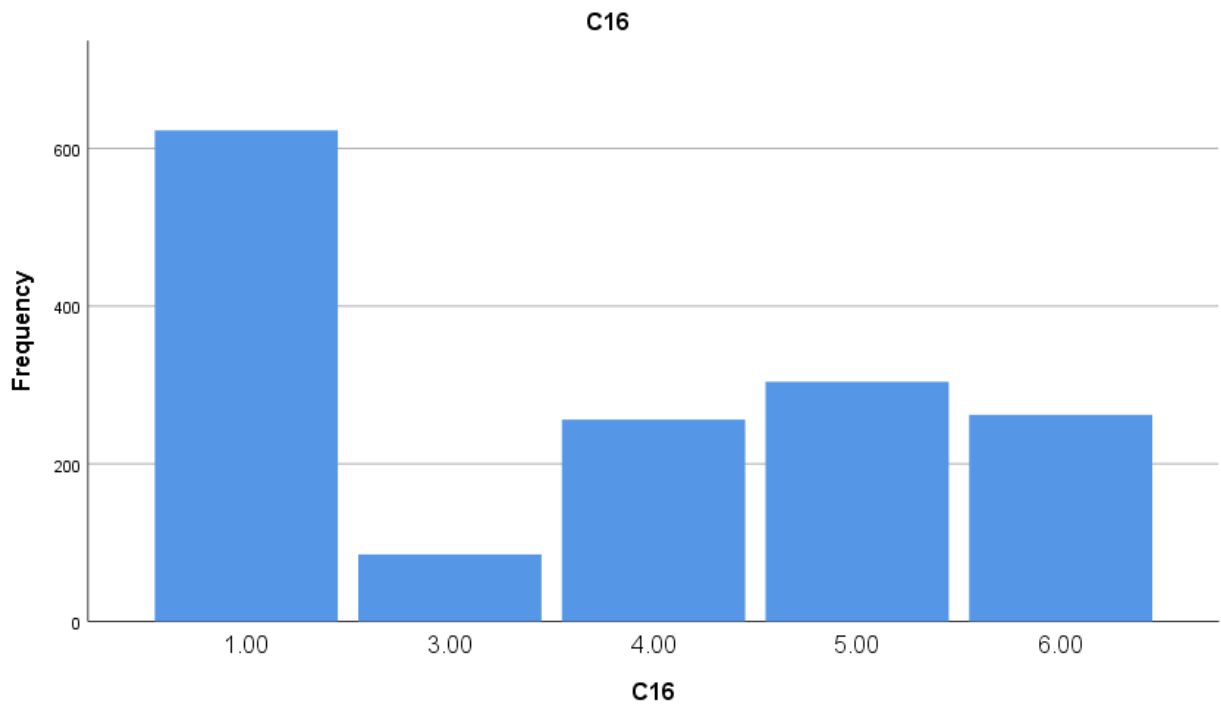



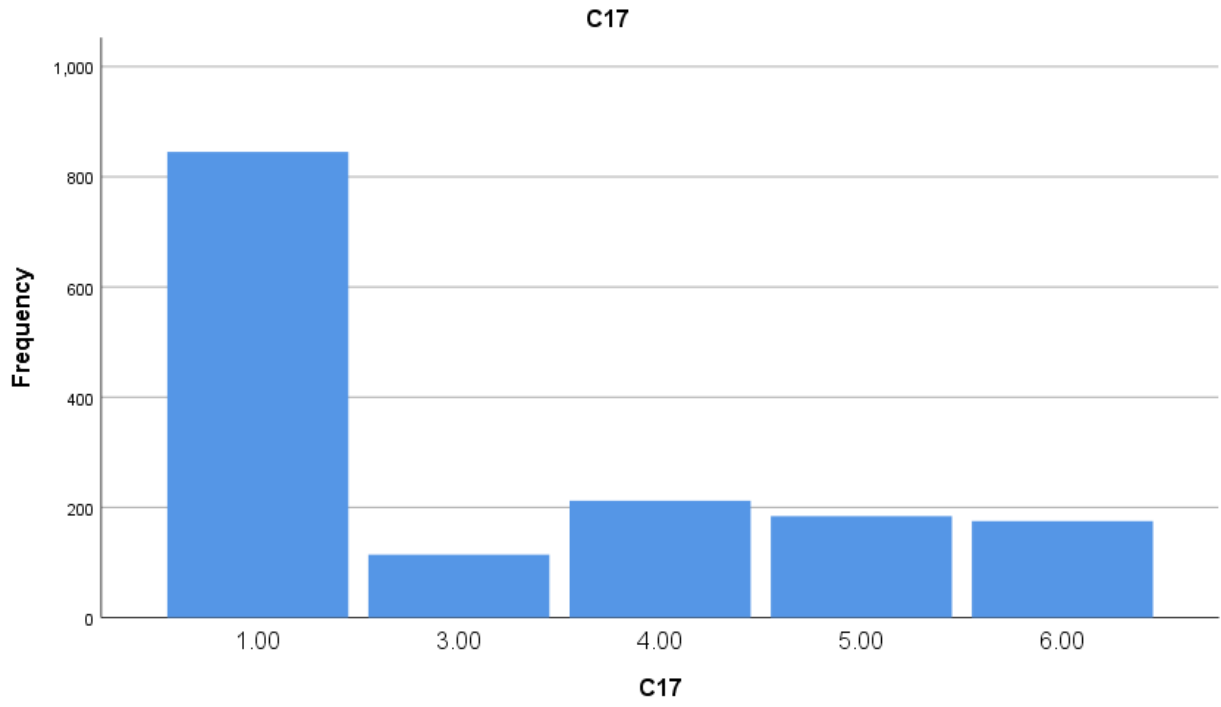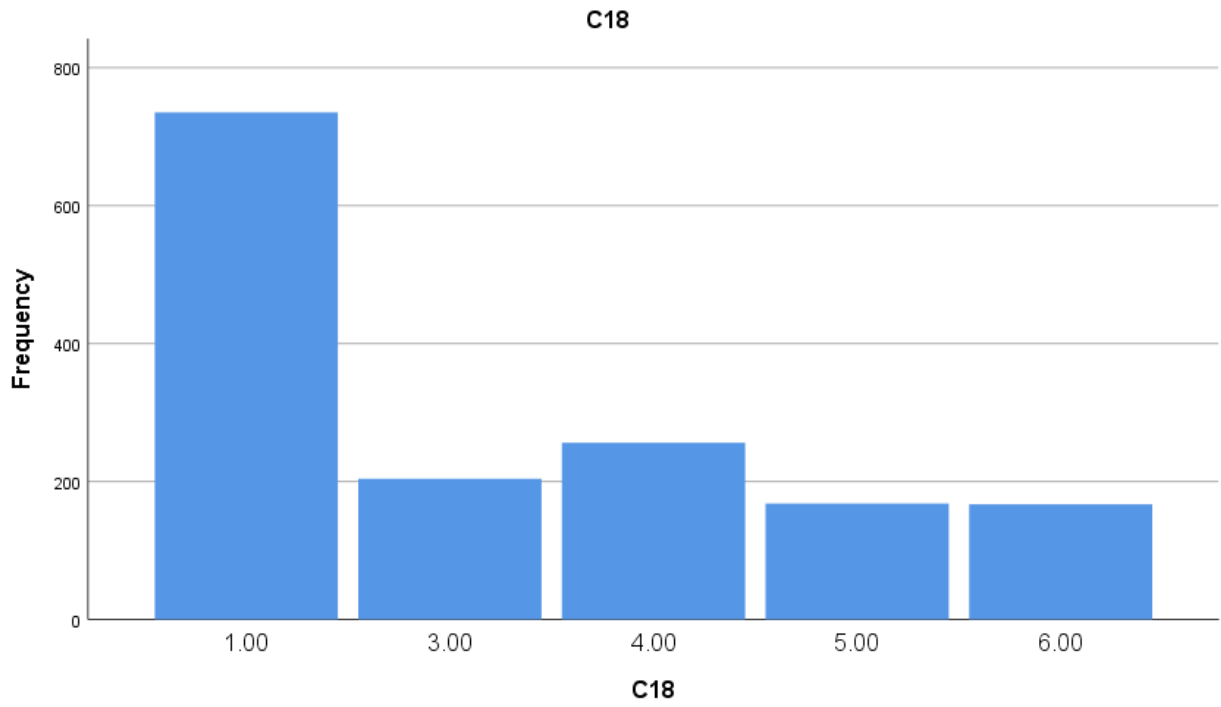

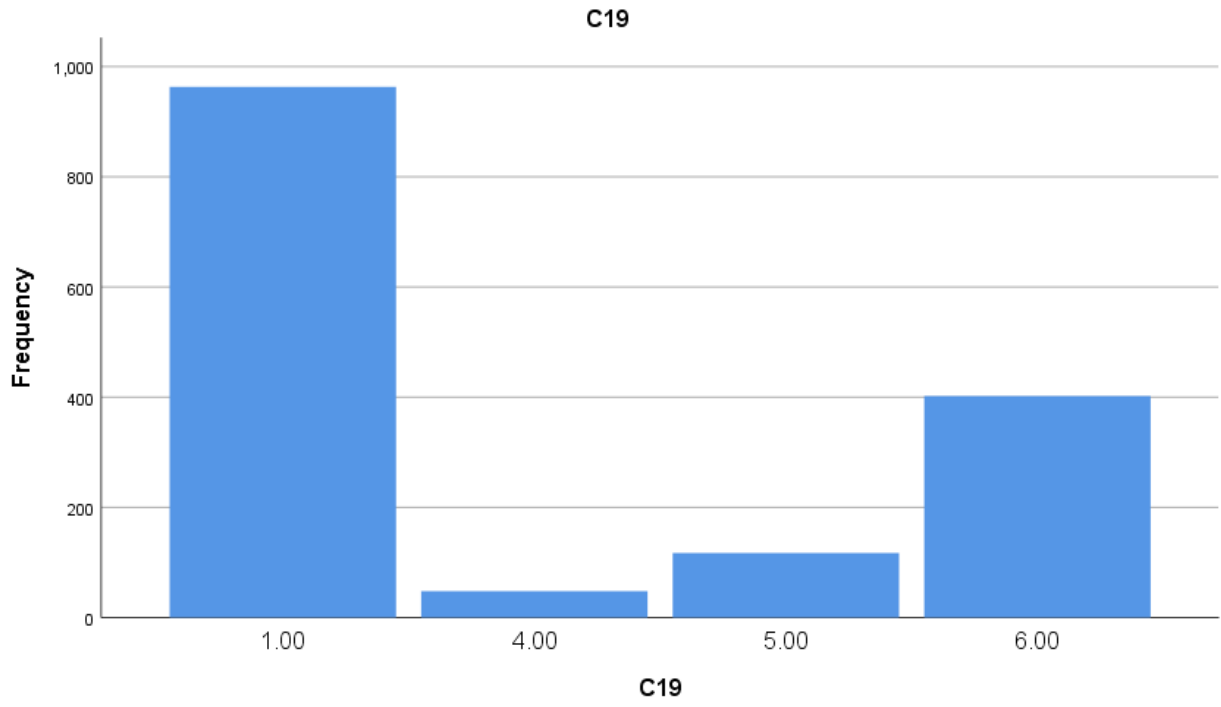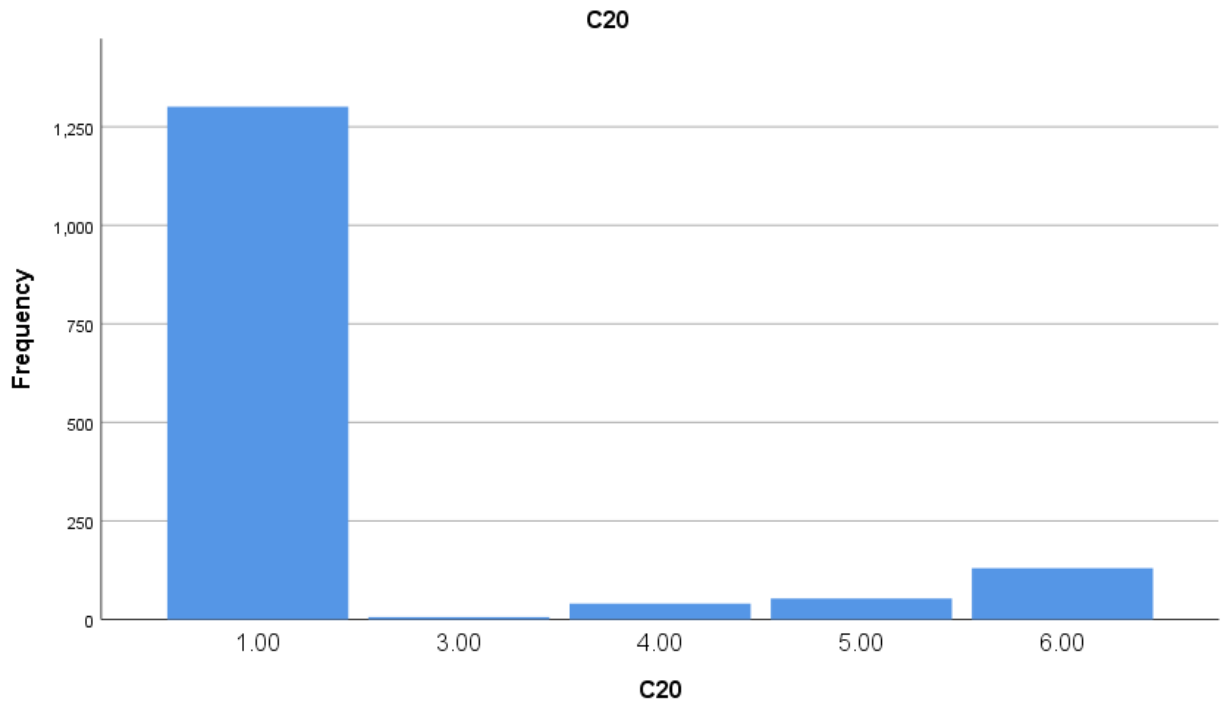

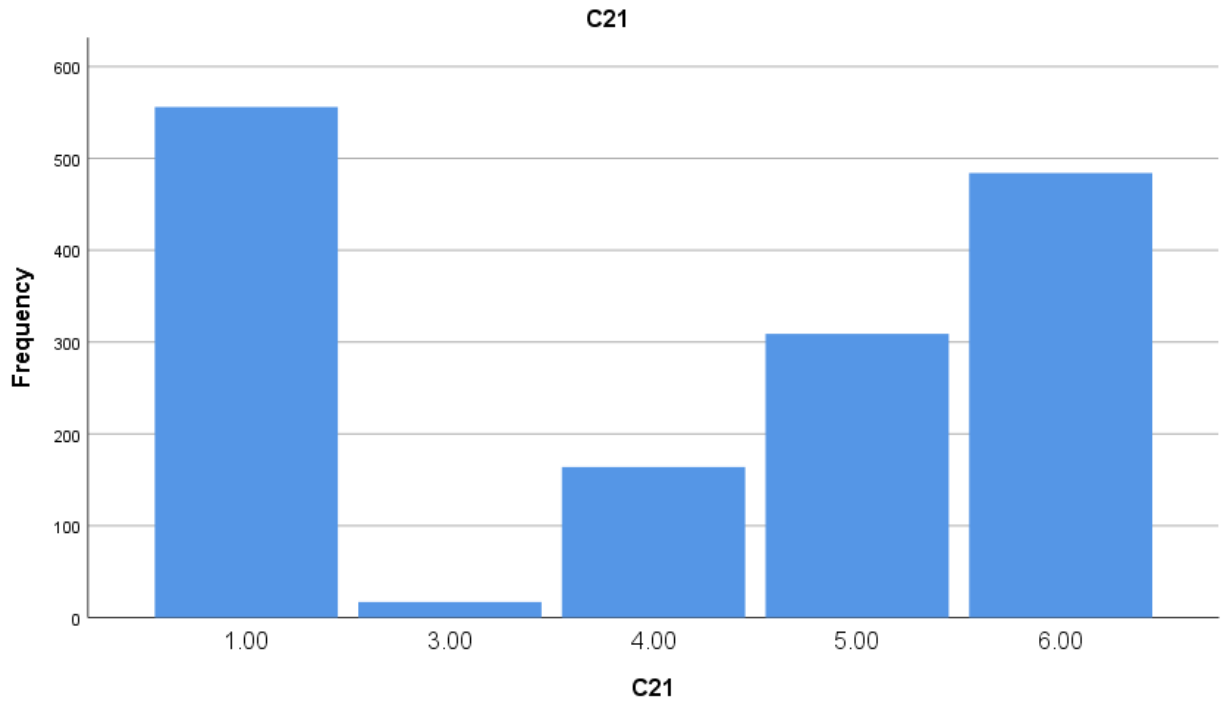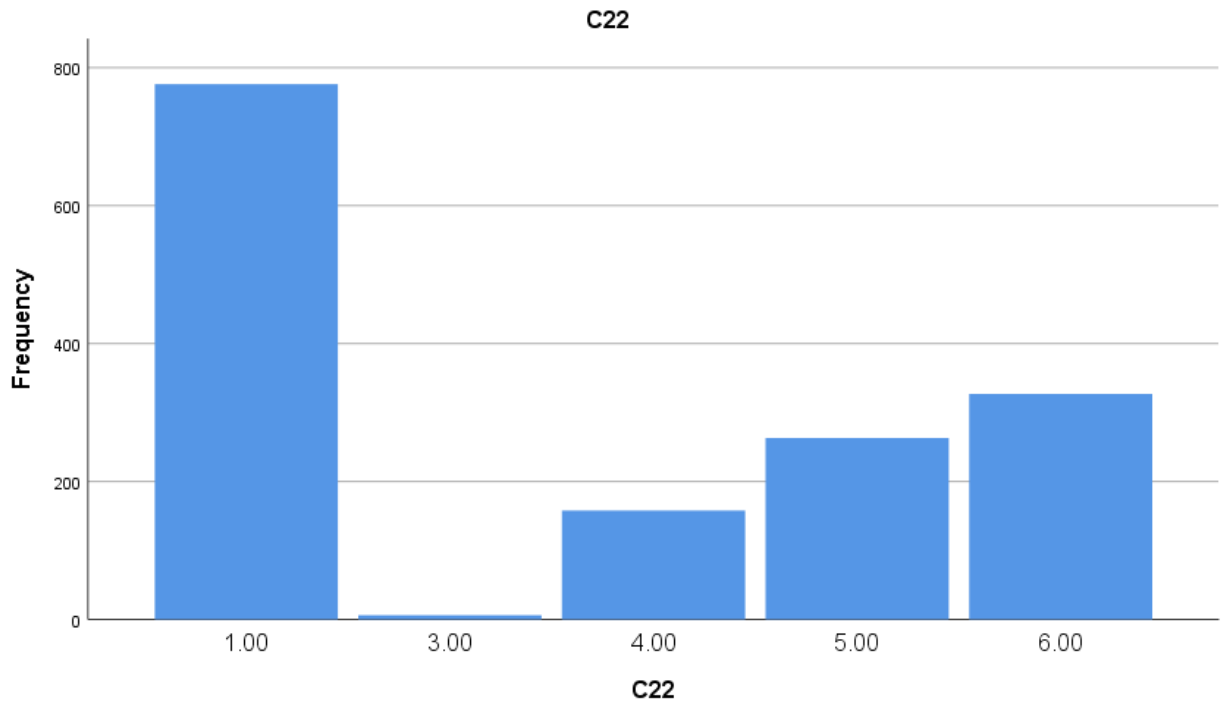

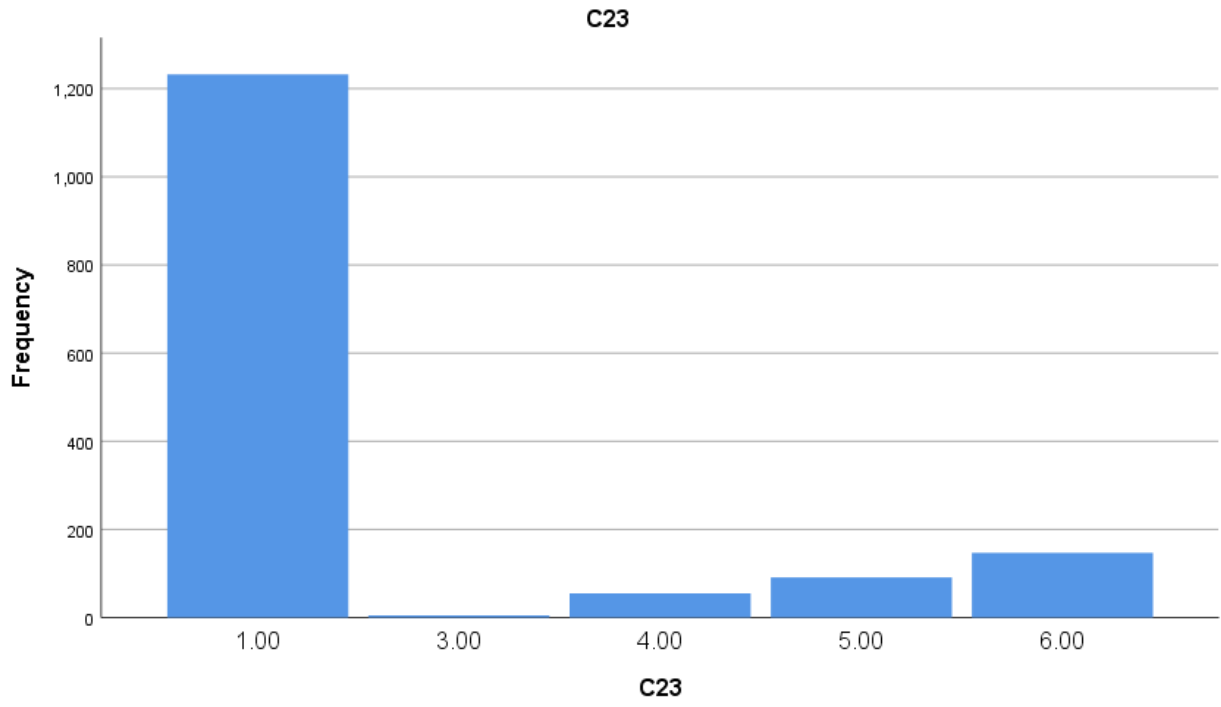

Supplement: NIHMS1738437-supplement-Supplemental_Material_1.pdf [file NIHMS1738437-supplement-Supplemental_Material_1.pdf]
